# Supplementary material for: Global, regional, and national quality of care of gallbladder and biliary tract cancer: a systematic analysis for the global burden of disease study 1990–2017
Source: PubMed Central journal article supplement (PMC8684179; doi:10.1186/s12939-021-01596-y), 2021-12-18

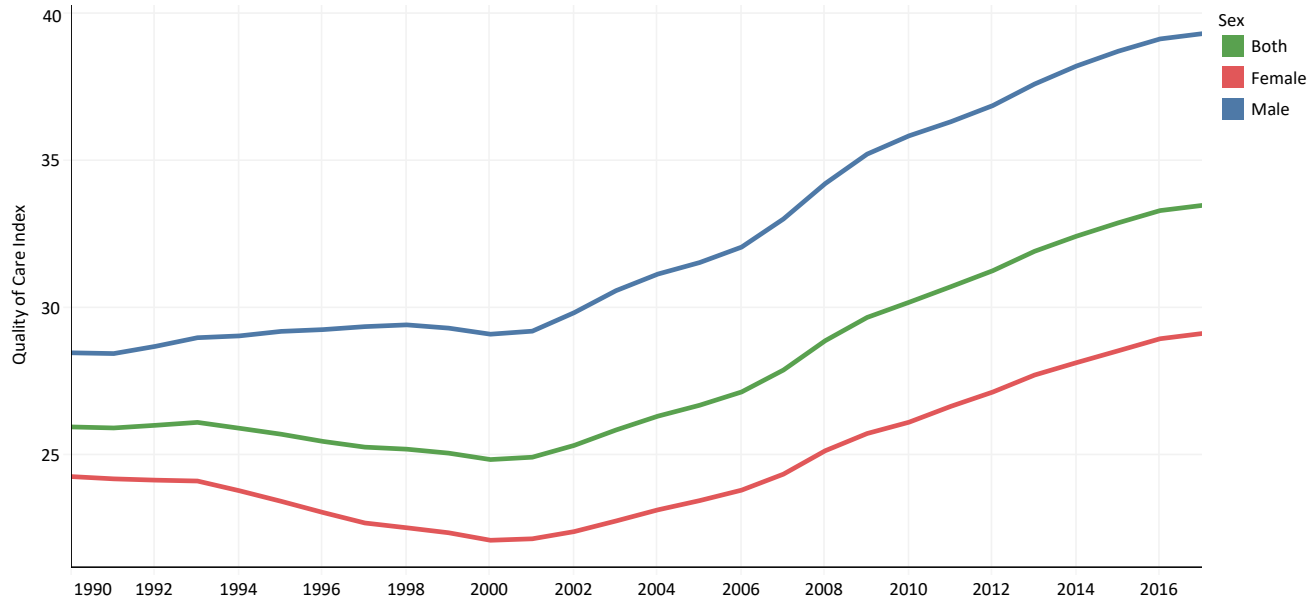

Supplement: 12939_2021_1596_MOESM5_ESM.pdf [file 12939_2021_1596_MOESM5_ESM.pdf]
